# Supplementary material
Source: Royal Society of Chemistry journal article supplement (doi:10.1039/d6nj00604c)
Supplement: d6nj00604c1.pdf [file d6nj00604c1.pdf]

*Supporting Information*

## **Migratory fluorescent probe for monitoring dynamic changes in lysosomal pH during apoptosis**

Dingkun Xiong, Enxiang Ge, Guofang Li, Meini Tang, Weiyang Lin\*

Institute of Optical Materials and Chemical Biology, Guangxi Key Laboratory of Electrochemical Energy Materials, School of Chemistry and Chemical Engineering, Guangxi University, Nanning, Guangxi 530004, P. R. China

E-mail address: [weiyanglin2013@163.com](mailto:weiyanglin2013@163.com)

---

\*Correspondence to: Weiyang Lin, Institute of Optical Materials and Chemical Biology, Guangxi Key Laboratory of Electrochemical Energy Materials, School of Chemistry and Chemical Engineering, Guangxi University, Nanning, Guangxi 530004, P. R. China

Email: [weiyanglin2013@163.com](mailto:weiyanglin2013@163.com).

## Content

|                                                          |     |
|----------------------------------------------------------|-----|
| <b>Experimental</b> .....                                | S4  |
| <b>1. Experimental instruments and reagents</b> .....    | S4  |
| <b>2. Optical studies and analysis</b> .....             | S4  |
| <b>3. The fluorescence quantum yield of probes</b> ..... | S4  |
| <b>4. Cytotoxicity assay</b> .....                       | S5  |
| <b>5. Culture and preparation of HepG2 cells</b> .....   | S5  |
| <b>6. Cell fluorescent imaging</b> .....                 | S6  |
| <b>7. Synthesis of probes</b> .....                      | S10 |
| <b>Fig. S1.</b> .....                                    | S10 |
| <b>8. Supplementary Figure and Table</b> .....           | S11 |
| <b>Fig. S2.</b> .....                                    | S12 |
| <b>Fig. S3.</b> .....                                    | S13 |
| <b>Fig. S4.</b> .....                                    | S13 |
| <b>Fig. S5.</b> .....                                    | S13 |
| <b>Fig. S6.</b> .....                                    | S14 |
| <b>Fig. S7.</b> .....                                    | S14 |
| <b>Fig. S8.</b> .....                                    | S15 |
| <b>Fig. S9.</b> .....                                    | S15 |
| <b>Fig. S10.</b> .....                                   | S16 |
| <b>Fig. S11.</b> .....                                   | S17 |
| <b>Fig. S12.</b> .....                                   | S17 |
| <b>Fig. S13.</b> .....                                   | S18 |
| <b>Fig. S14.</b> .....                                   | S18 |
| <b>Fig. S15.</b> .....                                   | S19 |
| <b>Fig. S16.</b> .....                                   | S16 |

|                        |     |
|------------------------|-----|
| <b>Fig. S17.</b> ..... | S19 |
| <b>Fig. S18.</b> ..... | S20 |
| <b>Fig. S19.</b> ..... | S20 |
| <b>Fig. S20.</b> ..... | S21 |
| <b>Fig. S21.</b> ..... | S21 |
| <b>Fig. S22.</b> ..... | S22 |
| <b>Fig. S23.</b> ..... | S22 |
| <b>Fig. S24.</b> ..... | S23 |
| <b>Fig. S25.</b> ..... | S23 |
| <b>Fig. S26.</b> ..... | S24 |
| <b>Fig. S27.</b> ..... | S24 |
| <b>Fig. S28.</b> ..... | S25 |
| <b>Fig. S29.</b> ..... | S25 |

## Experimental

### 1. Experimental instruments and reagents

The reagents used in this experiment were commercially available and had not been subjected to any further purification. TLC analysis was carried out on silica gel plates and column chromatography was conducted over silica gel (mesh 200-300), both of which were purchased from the Qingdao Ocean Chemicals. All aqueous solutions were prepared with ultrapure water obtained from a Milli-Q water purification system (18.2 M $\Omega$ ·cm). The UV-Vis spectra were obtained by a UV-2700 spectrophotometer (Shimadzu, Japan). In addition, all fluorescent spectra were tested at the room temperature using an F-4600 fluorescent spectrophotometer (Japan Hitachi). HepG2(human hepatocellular carcinoma cells) were purchased from Beyotime(Gene expression databases: ArrayExpress). High resolution mass spectra were acquired on Agilent 7250& JEOL-JMS-T100LP AccuTOF (Bruker Daltonics, Billerica, MA, USA). <sup>1</sup>H and <sup>13</sup>C NMR spectra were measured on a Bruker Avance III HD 600 MHz NMR spectrometer (United States of America). The fluorescent imaging of the cells was performed with a Leica TCS SP8 CARS confocal microscope.

### 2. Optical studies and analysis

A stock solution (5 mM) of probe **KY-1** was obtained by weighing 5.03 mg of **KY-1** probe solid powder and dissolving it in 2 mL dimethyl sulfoxide (DMSO) analytical solution. All spectrometric probes were used at a concentration of 10  $\mu$ M.

A stock solution (5 mM) of probe **KY-OH** was obtained by weighing 5.34 mg of **KY-OH** probe solid powder and dissolving it in 2 mL N,N-Dimethylformamide (DMF) analytical solution. All spectrometric probes were used at a concentration of 10  $\mu$ M.

The stock solutions (10 mM) of DL-Homocysteine, L-Cysteine, L-Alanine, L-Methionine, L-Glutamic Acid, L-Arginine, L-Ascorbic Acid, L-Lysine, L-Tyrosine, L-Proline, L-Tryptophan, L-Serine, L-Aspartic acid, L-Histidine, Dextrose, Phenylalanine, Glycine, Glutamic acid, Glutathione, S<sub>2</sub>O<sub>8</sub><sup>2-</sup>, HSO<sub>5</sub><sup>-</sup>, Leucine, S<sup>2-</sup>, HS<sup>-</sup>, Fe<sup>2+</sup>, K<sup>+</sup>, Na<sup>+</sup>, Cu<sup>+</sup>, SO<sub>4</sub><sup>2-</sup>, Fe<sup>3+</sup>, CO<sub>3</sub><sup>2-</sup>, F<sup>-</sup>, S<sub>2</sub>O<sub>3</sub><sup>2-</sup>, SO<sub>3</sub><sup>2-</sup>, HSO<sub>3</sub><sup>-</sup>, HSO<sub>4</sub><sup>-</sup>, CH<sub>3</sub>COO<sup>-</sup> were freshly prepared in ultrapure water, respectively.

### 3. The fluorescence quantum yield of probes

Calculation formula of fluorescence quantum yield:

$$\Phi_{sample} = \Phi_{standard} \left( \frac{A_{standard} F_{sample}}{A_{sample} F_{standard}} \right)$$

In the formula,  $\Phi_{\text{sample}}$  represents the fluorescence quantum yield of the sample under test;  $\Phi_{\text{standard}}$  is the fluorescence quantum yield of the standard sample;  $A_{\text{standard}}$  denotes the absorbance of the standard sample at the excitation wavelength;  $A_{\text{sample}}$  is the absorbance of the sample under test at the excitation wavelength;  $F_{\text{sample}}$  is the integral area of the fluorescence emission of the sample under test;  $F_{\text{standard}}$  represents the integral area of the fluorescence emission of the standard sample.

The fluorescence quantum yield of probe **KY-1** was obtained using Rhodamine B as the standard sample and water as the solvent. The fluorescence quantum yield of probe **KY-1** was measured in different solvents. The fluorescence quantum yield of **KY-OH** was obtained using a standard sample of quinine sulfate and a solvent of 0.1 M  $\text{H}_2\text{SO}_4$  aqueous solution. The fluorescence quantum yield of probe **KY-OH** in different solvents was measured.

#### 4. Cytotoxicity assay

The cytotoxicity of the probe **KY-1** to HepG2 cells was studied by standard MTT assays. About  $2 \times 10^4$  cells/mL HepG2 cells were incubated with various concentrations of **KY-1** (1, 2, 3, 5, 10, 20 and 50  $\mu\text{M}$ ) in 96-well plates for 24 h. Subsequent work was that 10  $\mu\text{L}$  MTT (5 mg/mL) was added to each well and continued to incubate for another 4 h. Then, violet formazan crystals were dissolved with DMSO (100  $\mu\text{L}$ ). The plate was shaken for about 10 min, and each well was analyzed by the microplate reader and detected at the absorbance of 490 nm.

$$\text{Cell viability} = \frac{\text{OD}_{\text{sample}} - \text{OD}_{\text{blank}}}{\text{OD}_{\text{control}} - \text{OD}_{\text{blank}}} \times 100\%$$

$\text{OD}_{\text{sample}}$  was the results obtained by cell incubated with different probe concentrations;  $\text{OD}_{\text{blank}}$  was the result obtained after adding DMSO;  $\text{OD}_{\text{control}}$  was the results obtained by cell incubated DMEM culture solution only.

#### 5. Culture and preparation of HepG2 cells

HepG2 cells were cultured in DMEM (Dulbecco's modified Eagle's medium) supplemented with 10% FBS (fetal bovine serum) in an atmosphere of 5%  $\text{CO}_2$  and 95% air at 37  $^\circ\text{C}$ . Before the experiments, the HepG2 cells in 35-mm glass-bottomed dishes were cultured to a density of  $2 \times 10^5$  cells per dish. Cells were incubated for 24 h. Cells will attach to the glass surface during this time. When the cell density reached 80% – 90%, digested with trypsin solution, then the cells were inoculated into 20 mm

confocal imaging dishes with a density of  $1 \times 10^5$  / mL and incubated for 24 h to make them wall-adherent. When the cells reached a density of about  $4 \times 10^5$  /mL, the original medium in the dish were washed and new medium were replaced, imaging experiments were performed.

## **6. Cell fluorescent imaging**

### **5.1. Bioimaging experiment of stimulated by Rapamycin (RAPA).**

HepG2 cells were cultured as above. The cultured HepG2 cells were seeded into glass culture dishes and cultured to  $4 \times 10^5$  cells / mL for fluorescent imaging. HepG2 cells were treated with fresh medium containing of Rapamycin ( $5 \mu\text{M}$ ) for 2 h. After the Rapamycin pretreatment was completed, the medium containing Rapamycin was removed, and the cells were washed three times with PBS. Fresh medium was then added, followed by the addition of  $10 \mu\text{M}$  **KY-OH** to the cell culture, which was incubated for 30 min. The cell images were obtained using the upright fluorescence microscope.

### **5.2. Bioimaging experiment of stimulated by Chloroquine (CQ).**

HepG2 cells were cultured as above. The cultured HepG2 cells were seeded into glass culture dishes and cultured to  $4 \times 10^5$  cells / mL for fluorescent imaging. HepG2 cells were treated with fresh medium containing of Chloroquine ( $20 \mu\text{M}$ ) for 3 h. After the Chloroquine pretreatment was completed, the medium containing Chloroquine was removed, and the cells were washed three times with PBS. Fresh medium was then added, followed by the addition of  $10 \mu\text{M}$  **KY-OH** to the cell culture, which was incubated for 30 min. The cell images were obtained using the upright fluorescence microscope.

### **5.3. Bioimaging experiment of stimulated by $\text{NH}_4\text{Cl}$ .**

HepG2 cells were cultured as above. The cultured HepG2 cells were seeded into glass culture dishes and cultured to  $4 \times 10^5$  cells / mL for fluorescent imaging. HepG2 cells were treated with fresh medium containing of  $\text{NH}_4\text{Cl}$  ( $4 \text{ mM}$ ) for 12 h. After the  $\text{NH}_4\text{Cl}$  pretreatment was completed, the medium containing  $\text{NH}_4\text{Cl}$  was removed, and the cells were washed three times with PBS. Fresh medium was then added, followed by the addition of  $10 \mu\text{M}$  **KY-OH** to the cell culture, which was incubated for 30 min. The cell images were obtained using the upright fluorescence microscope.

### **5.4. Bioimaging experiment of stimulated by LPS.**

HepG2 cells were cultured as above. The cultured HepG2 cells were seeded into glass culture dishes and cultured to  $4 \times 10^5$  cells / mL for fluorescent imaging. HepG2

cells were treated with fresh medium containing of LPS (1 mg / mL) for 1 h. After the LPS pretreatment was completed, the medium containing LPS was removed, and the cells were washed three times with PBS. Fresh medium was then added, followed by the addition of 10  $\mu$ M **KY-OH** to the cell culture, which was incubated for 30 min. The cell images were obtained using the upright fluorescence microscope.

### **5.5. Bioimaging experiment of stimulated by LPS+ Dexamethasone.**

HepG2 cells were cultured as above. The cultured HepG2 cells were seeded into glass culture dishes and cultured to  $4 \times 10^5$  cells/mL for fluorescent imaging. HepG2 cells were treated with fresh medium containing of LPS (1 mg/mL) for 1 h, After the LPS pretreatment was completed, the medium containing LPS was removed, and the cells were washed three times with PBS. Fresh medium was then added, followed by the addition of 20  $\mu$ M Dexamethasone for 0.5 h, After the Dexamethasone pretreatment was completed, the medium containing Dexamethasone was removed, and the cells were washed three times with PBS. Fresh medium was then added, followed by the addition of 10  $\mu$ M **KY-OH** to the cell culture, which was incubated for 30 min. The cell images were obtained using the upright fluorescence microscope.

### **5.6. Bioimaging Experiments of H<sub>2</sub>O<sub>2</sub>-Induced Apoptosis**

HepG2 cells were cultured as above. The cultured HepG2 cells were seeded into glass culture dishes and cultured to  $4 \times 10^5$  cells/mL for fluorescent imaging. HepG2 cells were treated with fresh medium containing of H<sub>2</sub>O<sub>2</sub> (15  $\mu$ M) for 0.5 h, After the H<sub>2</sub>O<sub>2</sub> pretreatment was completed, the medium containing H<sub>2</sub>O<sub>2</sub> was removed, and the cells were washed three times with PBS. Fresh medium was then added, followed by the addition of 10  $\mu$ M **KY-OH** to the cell culture, which was incubated for 30 min. The cell images were obtained using the upright fluorescence microscope.

### **5.7. Bioimaging Experiments of Colchicine-Induced Apoptosis**

HepG2 cells were cultured as above. The cultured HepG2 cells were seeded into glass culture dishes and cultured to  $4 \times 10^5$  cells/mL for fluorescent imaging. HepG2 cells were treated with fresh medium containing of Colchicine (10  $\mu$ M) for 24 h, After the Colchicine pretreatment was completed, the medium containing Colchicine was removed, and the cells were washed three times with PBS. Fresh medium was then added, followed by the addition of 10  $\mu$ M **KY-OH** to the cell culture, which was

incubated for 30 min. The cell images were obtained using the upright fluorescence microscope.

#### **5.8. Bioimaging Experiments of Rotenone-Induced Apoptosis**

HepG2 cells were cultured as above. The cultured HepG2 cells were seeded into glass culture dishes and cultured to  $4 \times 10^5$  cells/mL for fluorescent imaging. HepG2 cells were treated with fresh medium containing of Rotenone (10  $\mu$ M) for 24 h, After the Rotenone pretreatment was completed, the medium containing Rotenone was removed, and the cells were washed three times with PBS. Fresh medium was then added, followed by the addition of 10  $\mu$ M **KY-OH** to the cell culture, which was incubated for 30 min. The cell images were obtained using the upright fluorescence microscope.

#### **5.9. Bioimaging experiment of stimulated by CCCP (Carbonyl Cyanide3-ChloroPhenylhydrazone).**

HepG2 cells were cultured as above. The cultured HepG2 cells were seeded into glass culture dishes and cultured to  $4 \times 10^5$  cells / mL for fluorescent imaging. HepG2 cells were treated with fresh medium containing of CCCP (20  $\mu$ M) for 0.5 h. After the CCCP pretreatment was completed, the medium containing CCCP was removed, and the cells were washed three times with PBS. Fresh medium was then added, followed by the addition of 10  $\mu$ M **KY-1** to the cell culture, which was incubated for 30 min. The cell images were obtained using the upright fluorescence microscope.

#### **5.10. Co-location experimental imaging**

HepG2 cells were cultured as above. The cultured HepG2 cells were seeded into glass culture dishes and cultured to  $4 \times 10^5$  cells/mL to fluorescent imaging. HepG2 cells were incubated with **KY-1** (10  $\mu$ M) and Mito-Tracker Green (10  $\mu$ M, a commercial dye targeting Mitochondria) for 30 min, cells were washed three times with PBS prior to imaging. The confocal fluorescent imaging was manipulated with red channel ( $\lambda_{\text{ex}} = 510$  nm) for **KY-1**, green channel ( $\lambda_{\text{ex}} = 490$ nm) for Mito-Tracker Green. The Mitochondria localization ability of **KY-1** was analyzed by the Pearson coefficient.

HepG2 cells were cultured as above. The cultured HepG2 cells were seeded into glass culture dishes and cultured to  $4 \times 10^5$  cells/mL to fluorescent imaging. HepG2 cells were incubated with **KY-OH** (10  $\mu$ M) and Lyso-Tracker Green (10  $\mu$ M, a commercial dye targeting Lysosomes) for 30 min, cells were washed three times with PBS prior to

imaging. The confocal fluorescent imaging was manipulated with red channel ( $\lambda_{\text{ex}} = 470 \text{ nm}$ ) for **KY-OH**, green channel ( $\lambda_{\text{ex}} = 504 \text{ nm}$ ) for Lyso-Tracker Green. The Lysosomes localization ability of **KY-OH** was analyzed by the Pearson coefficient.

### 5.11. Model and parameters of inverted microscope upright fluorescence microscope

Cellular imaging was performed using a Revolve FL upright fluorescence microscope (Echo Laboratories) and an RVL-100-G microscope equipped with a 40 $\times$  objective lens (Discover-Echo, USA).

| Channel Name | Excitation Wavelength | Emission Wavelength |
|--------------|-----------------------|---------------------|
| DAPI         | 385/30                | 450/50              |
| FITC         | 470/40                | 525/50              |
| TxRed        | 560/40                | 635/60              |
| Cy5          | 640/30                | 690/50              |

### 5.12. performing $^1\text{H}$ NMR titration experiments on the probe under different pH conditions

we conducted  $^1\text{H}$  NMR experiments on the probe under different pH conditions. We used deuterated chloroform, deuterated methanol, deuterated trifluoroacetic acid, and deuterated sodium hydroxide to prepare three different pH  $^1\text{H}$  NMR reagents:

From the experiment, we can see that the probe exhibits different  $^1\text{H}$  NMR characteristic peaks under acidic and alkaline conditions, which are consistent with the  $^1\text{H}$  NMR results predicted by our designed **KY-OH** structure under acidic and alkaline conditions, indicating that the probe exhibits different structures under acidic and alkaline conditions.

## 7. Synthesis of probes

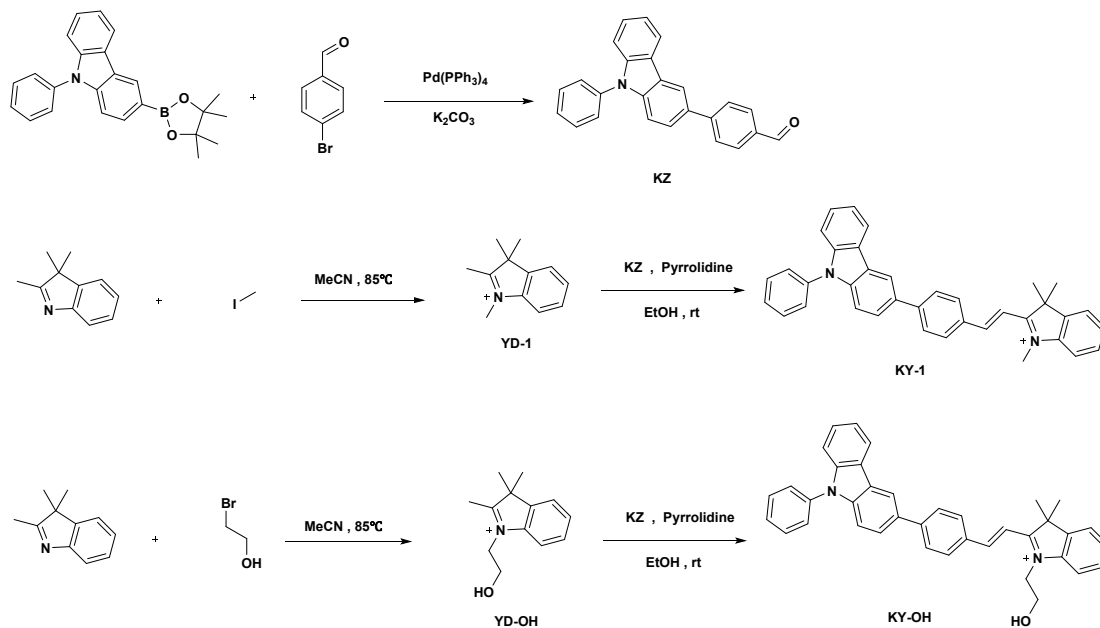

**Fig. S1.** Steps in the synthesis of the compound **KY-1** and **KY-OH**.

### Synthesis of **YD-1**:

Dissolve the starting material 2,3,3-trimethylindolenine (1 g, 6.28 mmol) and iodomethane (1.07 g, 7.54 mmol) in acetonitrile. The mixture was refluxed and stirred at 85°C for 12 h. After completion of the reaction, the solvent was removed under reduced pressure. Diethyl ether was added, and the mixture was sonicated. The residue was filtered under vacuum and washed with diethyl ether to afford the pink solid product **YD-1** (1.8 g, 95% yield). <sup>1</sup>H NMR (600 MHz, DMSO-*d*<sub>6</sub>) δ 7.95 – 7.90 (m, 1H), 7.87 – 7.81 (m, 1H), 7.63 (tt, *J* = 7.4, 6.0 Hz, 2H), 3.98 (d, *J* = 1.4 Hz, 3H), 2.78 (d, *J* = 1.4 Hz, 3H), 1.54 (s, 6H).

### Synthesis of **YD-OH**:

Dissolve the starting materials 2,3,3-trimethylindolenine (1 g, 6.28 mmol) and 2-bromoethanol (1 g, 7.54 mmol) in acetonitrile. The mixture was refluxed and stirred at 85°C for 12 h. After completion of the reaction, the solvent was removed under reduced pressure. Diethyl ether was added, and the mixture was sonicated. The solid was filtered under vacuum and washed with diethyl ether to afford the pink solid product **YD-OH** (1.7 g, 95% yield). <sup>1</sup>H NMR (600 MHz, DMSO-*d*<sub>6</sub>) δ 8.01 – 7.96 (m, 1H), 7.89 – 7.84

(m, 1H), 7.66 – 7.60 (m, 2H), 4.61 (t,  $J = 5.1$  Hz, 2H), 3.89 (dd,  $J = 5.8, 4.5$  Hz, 2H), 2.84 (s, 3H), 1.56 (s, 6H).

Synthesis of **KZ**:

React the starting material 9-Phenyl-3-(4,4,5,5-tetramethyl-1,3,2-dioxaborolan-2-yl)-9H-carbazole (2 g, 5.38 mmol), 4-Bromobenzaldehyde (1 g, 5.38 mmol), Pd(PPh<sub>3</sub>)<sub>4</sub> (0.062 g, 0.054 mmol), and K<sub>2</sub>CO<sub>3</sub> (1.2 g, 8.08 mmol) in a solvent prepared by mixing tetrahydrofuran: deionized water = 3:1. After nitrogen displacement, the mixture was refluxed and stirred at 70°C for 12 h. Upon completion, the solvent was removed under reduced pressure. The crude product was purified by column chromatography (DCM:PE = 2:1), yielding 1.8 g of the white solid product **KZ** in 95% yield. <sup>1</sup>H NMR (600 MHz, Chloroform-*d*)  $\delta$  10.10 (s, 1H), 8.45 (dd,  $J = 1.9, 0.7$  Hz, 1H), 8.24 (dt,  $J = 7.8, 1.0$  Hz, 1H), 8.03 – 8.00 (m, 2H), 7.93 – 7.90 (m, 2H), 7.73 (dd,  $J = 8.5, 1.8$  Hz, 1H), 7.66 (tt,  $J = 7.7, 1.9$  Hz, 2H), 7.63 – 7.61 (m, 2H), 7.55 – 7.50 (m, 2H), 7.50 – 7.45 (m, 2H), 7.36 (ddd,  $J = 7.9, 6.3, 1.7$  Hz, 1H).

## 8. Supplementary Figure and Table

**Table S1 Fluorescence quantum yield of KY-1 in different solvents.**

| Solvent          | $A_{\text{standrad}}$ | $A_{\text{sample}}$ | $F_{\text{standrad}}$ | $F_{\text{sample}}$ | $\Phi_{\text{standard}}$ | $\Phi_{\text{sample}}$ |
|------------------|-----------------------|---------------------|-----------------------|---------------------|--------------------------|------------------------|
| DMF              | 0.049                 | 0.05                | 428152.2              | 10111.92            | 0.31                     | 0.007175               |
| DMSO             | 0.049                 | 0.05                | 42800.58              | 11802.29            | 0.31                     | 0.083773               |
| H <sub>2</sub> O | 0.048                 | 0.049               | 428468.8              | 9358.371            | 0.31                     | 0.006633               |
| EtOH             | 0.05                  | 0.049               | 426562                | 10741.99            | 0.31                     | 0.007966               |
| 1,4-Dioxane      | 0.049                 | 0.049               | 426143                | 11090.48            | 0.31                     | 0.008068               |
| MeOH             | 0.049                 | 0.049               | 425315.3              | 12468.2             | 0.31                     | 0.009088               |
| MePh             | 0.05                  | 0.05                | 422466                | 9480.078            | 0.31                     | 0.006956               |
| THF              | 0.049                 | 0.05                | 420211.1              | 9230.746            | 0.31                     | 0.006674               |
| Glycerol         | 0.049                 | 0.047               | 417857.7              | 50200.24            | 0.31                     | 0.038827               |

**Table S2 Fluorescence quantum yield of KY-OH in different solvents.**

| Solvent          | $A_{\text{standrad}}$ | $A_{\text{sample}}$ | $F_{\text{standrad}}$ | $F_{\text{sample}}$ | $\Phi_{\text{standard}}$ | $\Phi_{\text{sample}}$ |
|------------------|-----------------------|---------------------|-----------------------|---------------------|--------------------------|------------------------|
| DMF              | 0.05                  | 0.049               | 34421.12              | 25209.59            | 0.58                     | 0.433454               |
| DMSO             | 0.049                 | 0.05                | 34890.59              | 26541.36            | 0.58                     | 0.432383               |
| H <sub>2</sub> O | 0.05                  | 0.048               | 35316.15              | 10713.88            | 0.58                     | 0.183286               |
| EtOH             | 0.05                  | 0.05                | 35802.58              | 22077.25            | 0.58                     | 0.35765                |
| 1,4-Dioxane      | 0.049                 | 0.048               | 36229.22              | 22830.41            | 0.58                     | 0.373111               |
| MeOH             | 0.05                  | 0.05                | 36638.88              | 20176.26            | 0.58                     | 0.319394               |
| MePh             | 0.05                  | 0.05                | 36890.43              | 11668.96            | 0.58                     | 0.183462               |
| THF              | 0.049                 | 0.05                | 37115.81              | 21005.74            | 0.58                     | 0.321687               |
| Glycerol         | 0.05                  | 0.05                | 37365.54              | 9864.32             | 0.58                     | 0.153117               |

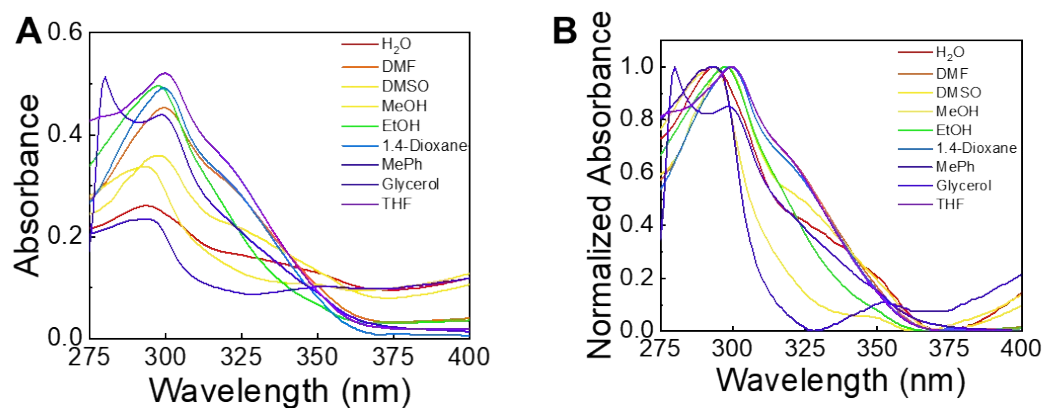

**Fig. S2.** (A) Ultraviolet absorption spectra of probe **KY-1** in different solvents; (B) normalized ultraviolet absorption spectra.

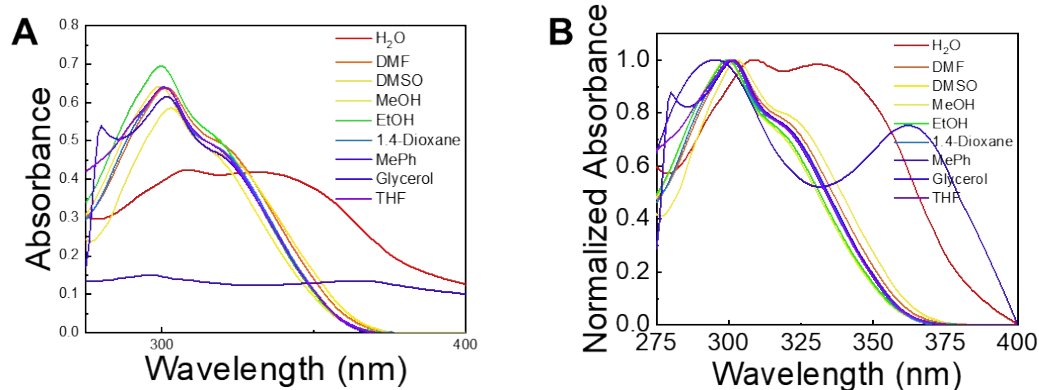

**Fig. S3.** (A) Ultraviolet absorption spectra of probe **KY-OH** in different solvents; (B). normalized ultraviolet absorption spectra.

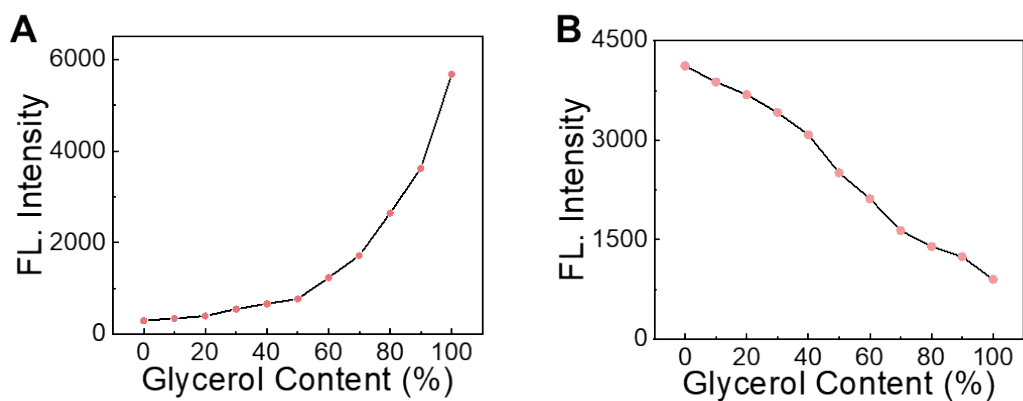

**Fig. S4.** (A) Fluorescence emission intensity of probe **KY-1** at  $\lambda = 580$  nm under different viscosity conditions; (B) Fluorescence emission intensity of probe **KY-OH** at  $\lambda = 398$  nm under different viscosity conditions.

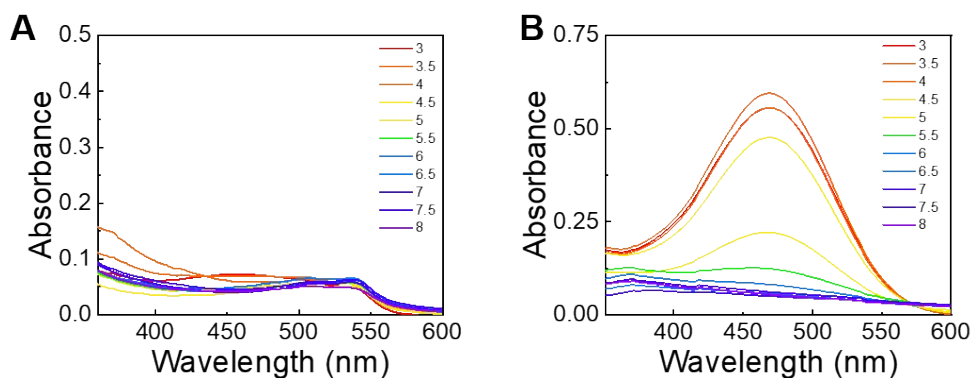

**Fig. S5.** (A) Ultraviolet absorption spectra of probe **KY-1** in different pH buffers; (B) Ultraviolet absorption spectra of probe **KY-OH** in different pH buffers.

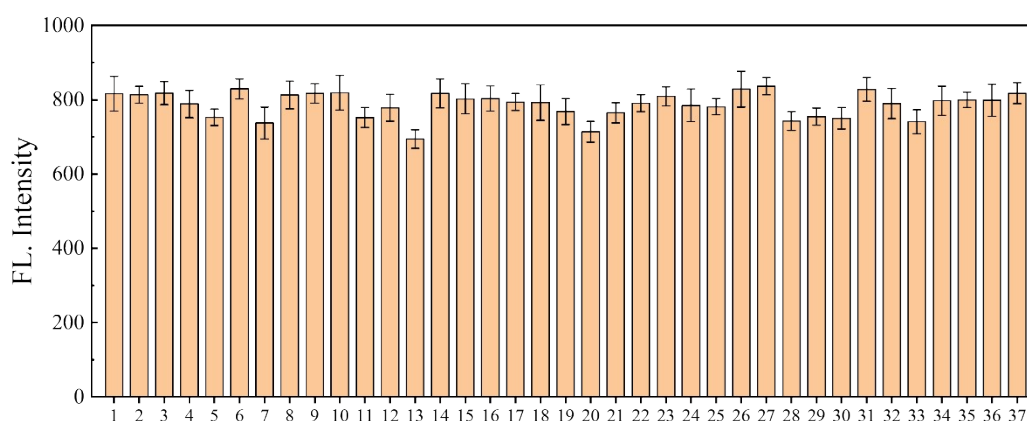

**Fig. S6.** Fluorescence intensity of **KY-1** (10  $\mu\text{M}$ ) at 564 nm under the influence of different substances (10  $\mu\text{M}$ ); 1. DL-Homocysteine, 2. L-Cysteine, 3. L-Alanine, 4. L-Methionine, 5. L-Glutamic Acid, 6. L-Arginine, 7. L-Ascorbic Acid, 8. L-Lysine, 9. L-Tyrosine, 10. L-Proline, 11. L-Tryptophan, 12. L-Serine, 13. L-Aspartic acid, 14. L-Histidine, 15. Dextrose, 16. Phenylalanine, 17. Glycine, 18. Glutamic acid, 19. Glutathione, 20.  $\text{S}_2\text{O}_8^{2-}$ , 21.  $\text{HSO}_5^-$ , 22. Leucine, 23.  $\text{S}^{2-}$ , 24.  $\text{HS}^-$ , 25.  $\text{Fe}^{2+}$  26.  $\text{K}^+$ , 27.  $\text{Na}^+$ , 28.  $\text{Cu}^+$ , 29.  $\text{Fe}^{2+}$ , 30.  $\text{Fe}^{3+}$ , 31.  $\text{CO}_3^{2-}$ , 32.  $\text{F}^-$ , 33.  $\text{S}_2\text{O}_3^{2-}$ , 34.  $\text{SO}_3^{2-}$ , 35.  $\text{HSO}_3^-$ , 36.  $\text{HSO}_4^-$ , 37.  $\text{CH}_3\text{COO}^-$ .

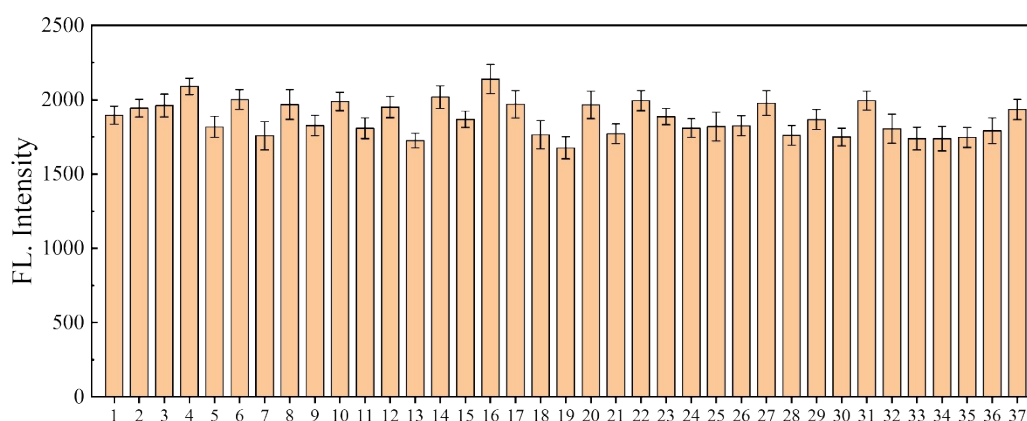

**Fig. S7.** Fluorescence intensity of **KY-OH** (10  $\mu\text{M}$ ) at 412 nm under the influence of different substances (10  $\mu\text{M}$ ); 1. DL-Homocysteine, 2. L-Cysteine, 3. L-Alanine, 4. L-Methionine, 5. L-Glutamic Acid, 6. L-Arginine, 7. L-Ascorbic Acid, 8. L-Lysine, 9. L-Tyrosine, 10. L-Proline, 11. L-Tryptophan, 12. L-Serine, 13. L-Aspartic acid, 14. L-Histidine, 15. Dextrose, 16. Phenylalanine, 17. Glycine, 18. Glutamic acid, 19. Glutathione, 20.  $\text{S}_2\text{O}_8^{2-}$ , 21.  $\text{HSO}_5^-$ , 22. Leucine, 23.  $\text{S}^{2-}$ , 24.  $\text{HS}^-$ , 25.  $\text{Fe}^{2+}$  26.  $\text{K}^+$ , 27.  $\text{Na}^+$ , 28.  $\text{Cu}^+$ , 29.  $\text{Fe}^{2+}$ , 30.  $\text{Fe}^{3+}$ , 31.  $\text{CO}_3^{2-}$ , 32.  $\text{F}^-$ , 33.  $\text{S}_2\text{O}_3^{2-}$ , 34.  $\text{SO}_3^{2-}$ , 35.  $\text{HSO}_3^-$ , 36.  $\text{HSO}_4^-$ , 37.  $\text{CH}_3\text{COO}^-$ .

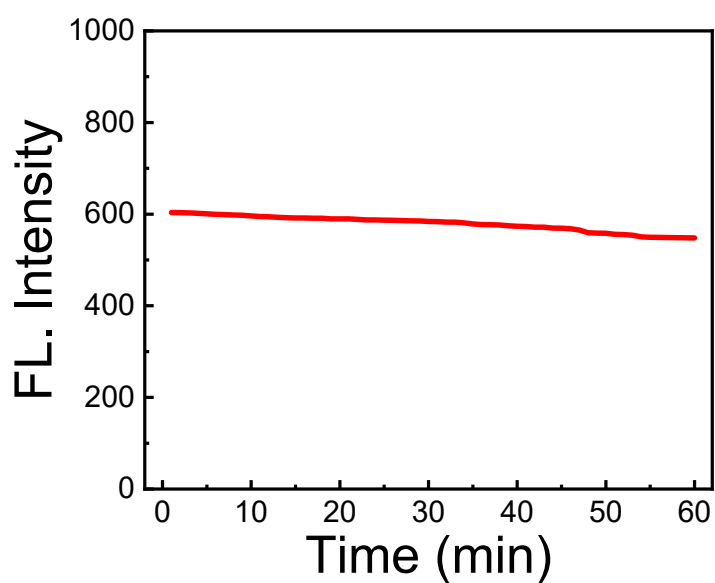

**Fig. S8.** Photostability test of probe **KY-OH** (10  $\mu\text{M}$ ) involved continuous kinetic scanning to measure changes in fluorescence intensity at 410 nm ( $\lambda_{\text{ex}}=340$  nm) in aqueous solution.

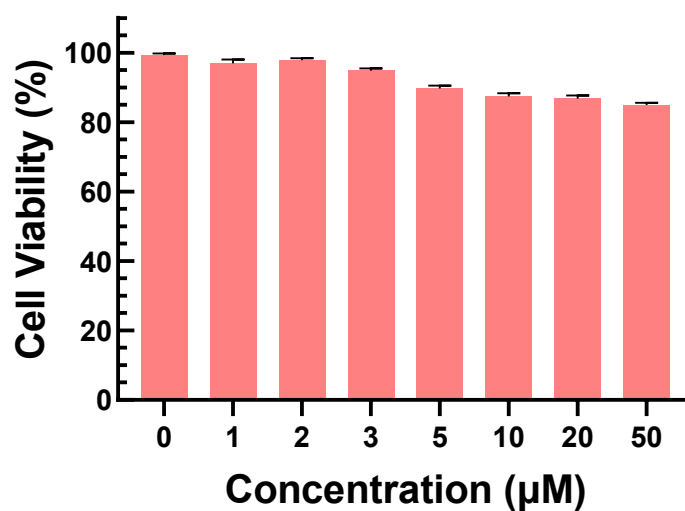

**Fig. S9.** Cytotoxicity assays conducted via the MTT method demonstrated that HepG2 cells treated with **KY-1** at various concentrations (1 – 50  $\mu\text{M}$ ) for 24 h.

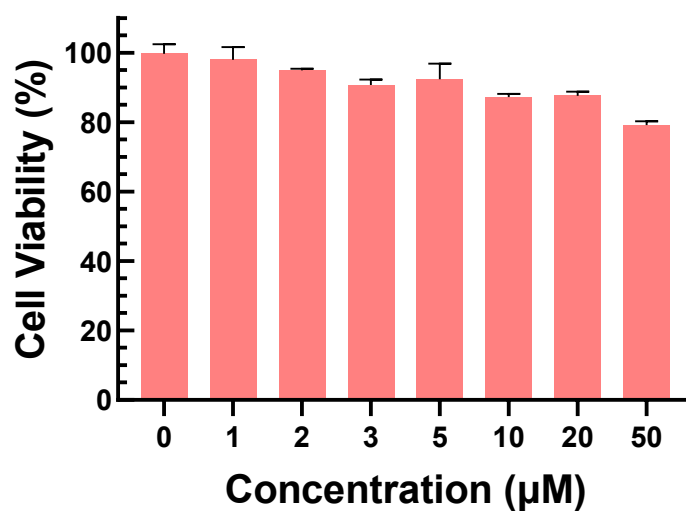

**Fig. S10.** Cytotoxicity assays conducted via the MTT method demonstrated that HepG2 cells treated with KY-OH at various concentrations (1 – 50 µM) for 24 h.

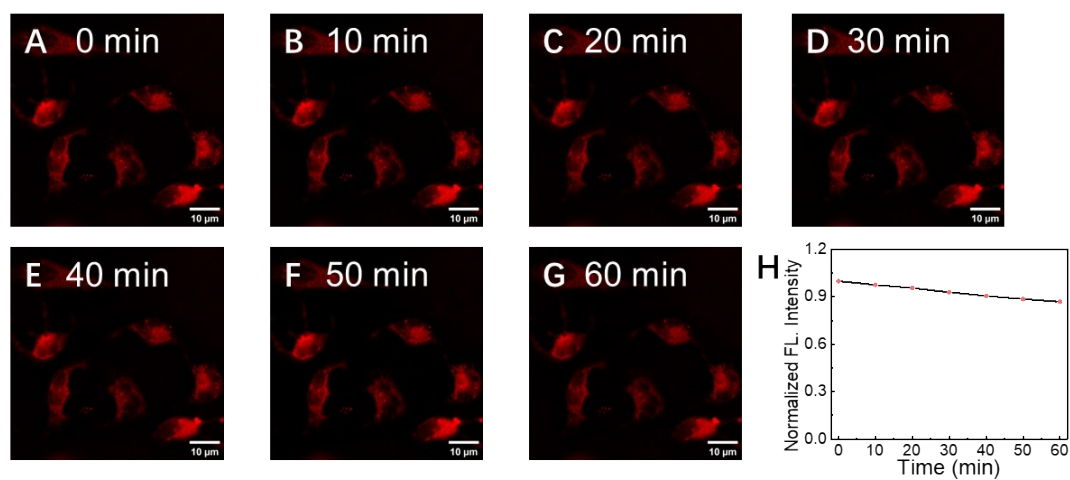

**Fig. S11.** (A-G) Time-lapse imaging of KY-OH in cells; (H). Fluorescence intensity analysis curve in cell imaging images. Scale bar: 10 µm..

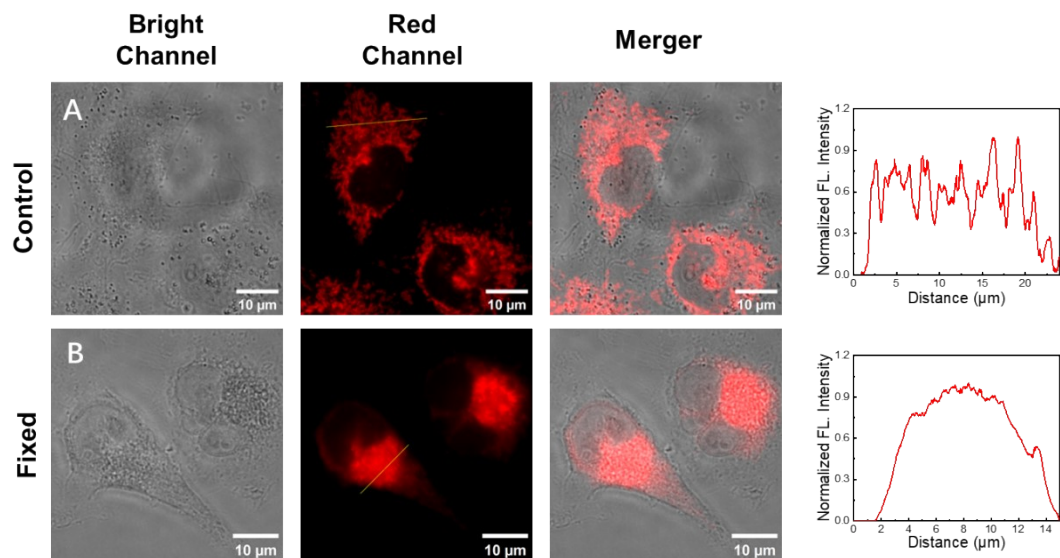

**Fig. S12.** (A) HepG2 cells stained with 10 μM **KY-1** for 30 min and imaged using an upright fluorescence microscope; (B) HepG2 cells stained with 10 μM **KY-1** for 30 min, fixed with 4% paraformaldehyde, and imaged using an upright fluorescence microscope. Scale bar: 10 μm.

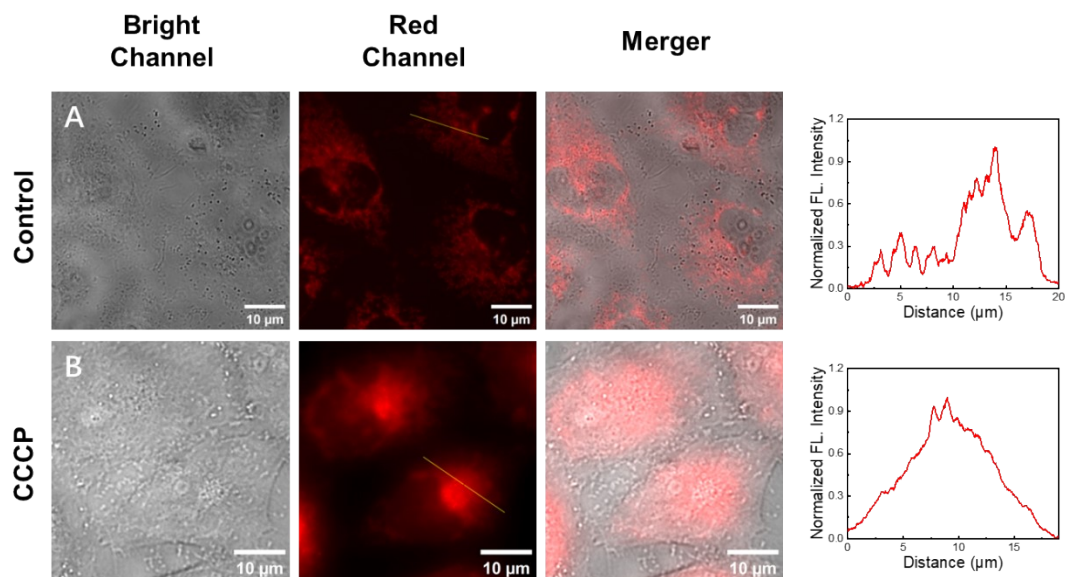

**Fig. S13.** (A) HepG2 cells were stained with 10 μM **KY-1** for 30 minutes and imaged using an upright fluorescence microscope; (B) HepG2 cells treated with 20 μM CCCP (Carbonyl Cyanide 3-ChloroPhenylhydrazine) for 30 min, followed by staining with 10 μM **KY-1** for 30 min, were imaged using an upright fluorescence microscope. Scale bar: 10 μm.

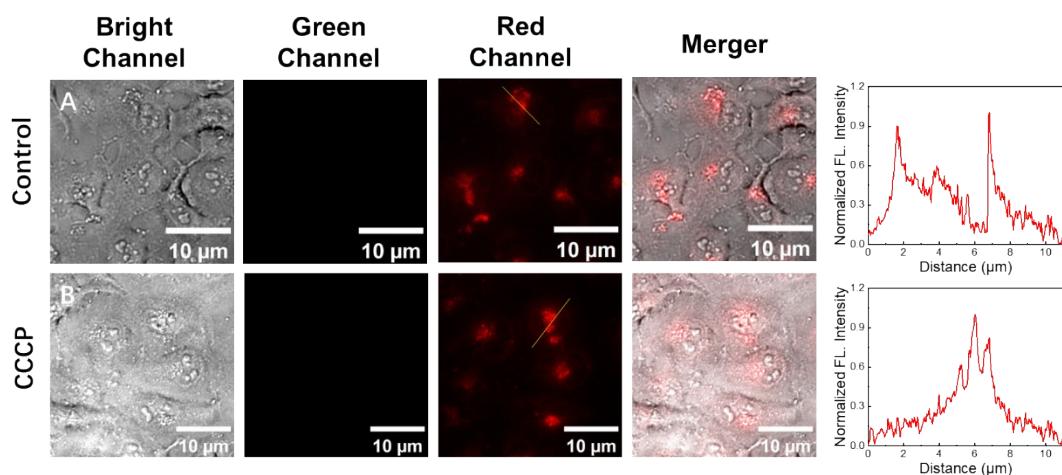

**Fig. S14.** (A) Imaging images and fluorescence intensity analysis curves of HepG2 cells after incubation with 10 μM acidified **KY-OH** for 30 min. (B) Imaging images and fluorescence intensity analysis curves of HepG2 cells after pre-incubation with CCCP for 30 min, followed by incubation with 10 μM acidified **KY-OH** for 30 min. Scale bar: 20 μm.

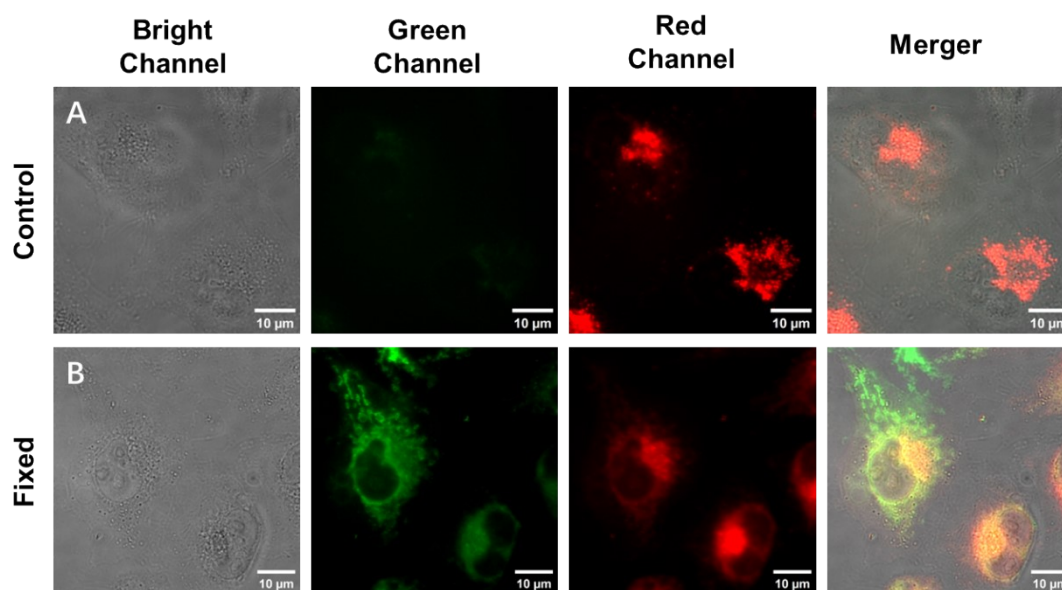

**Fig. S15.** (A) HepG2 cells stained with 10 μM **KY-OH** for 30 min and imaged using an upright fluorescence microscope; (B) HepG2 cells stained with 10 μM **KY-OH** for 30 min, fixed with 4% paraformaldehyde, and imaged using an upright fluorescence microscope. Scale bar: 10 μm.

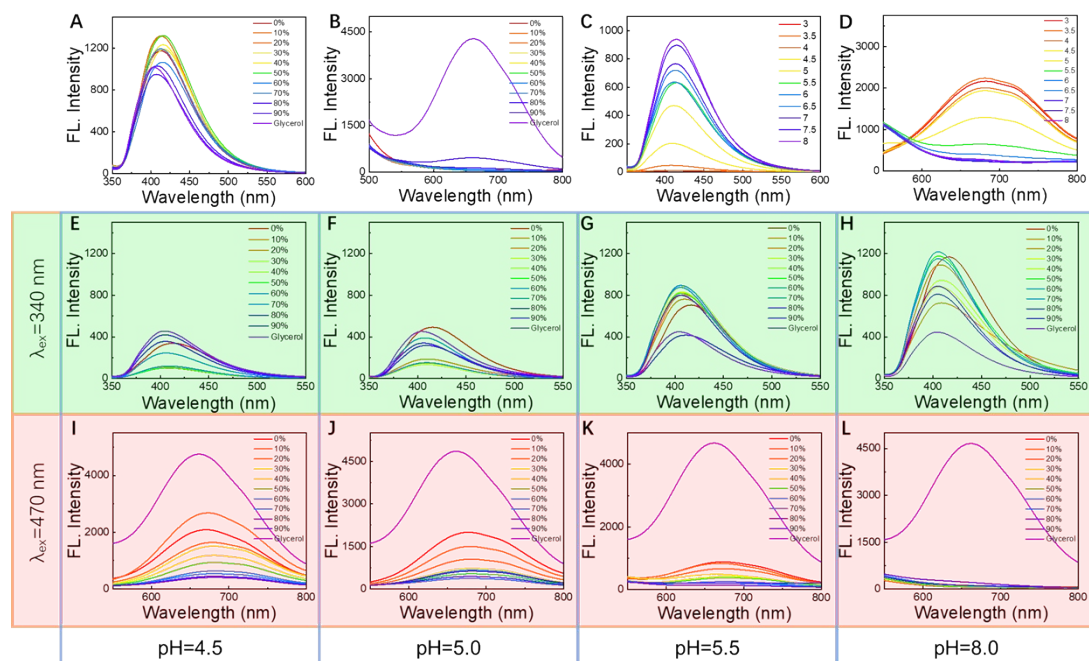

**Fig. S16.** (A-B) Fluorescence spectra of 10  $\mu\text{M}$  **KY-OH** at different viscosities (PBS: Glycerol) at  $\lambda_{\text{ex}} = 340$  nm and  $\lambda_{\text{ex}} = 470$  nm, respectively; (C-D) Fluorescence spectra of 10  $\mu\text{M}$  **KY-OH** at different pH conditions with  $\lambda_{\text{ex}} = 340$  nm and  $\lambda_{\text{ex}} = 470$  nm, respectively; (E-H) Fluorescence spectra of 10  $\mu\text{M}$  **KY-OH** at  $\lambda_{\text{ex}} = 340$  nm under different pH and viscosity conditions; (I-L) Fluorescence spectra of 10  $\mu\text{M}$  **KY-OH** at  $\lambda_{\text{ex}} = 470$  nm under different pH and viscosity conditions.

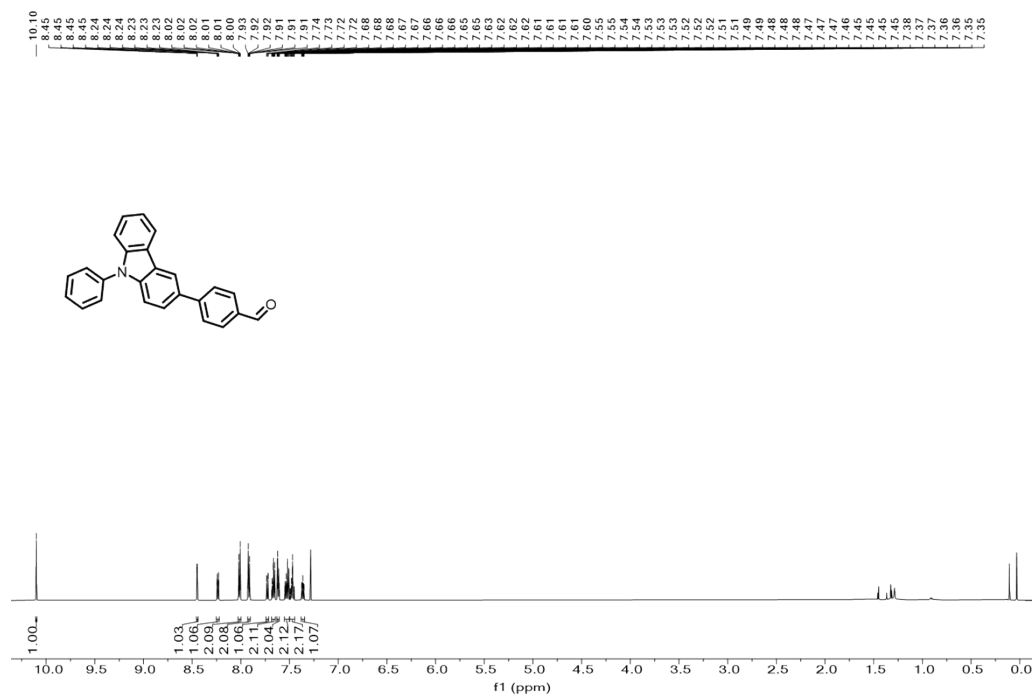

**Fig. S17.** The  $^1\text{H}$  NMR spectrum of compound **KZ** in Chloroform-*d*.

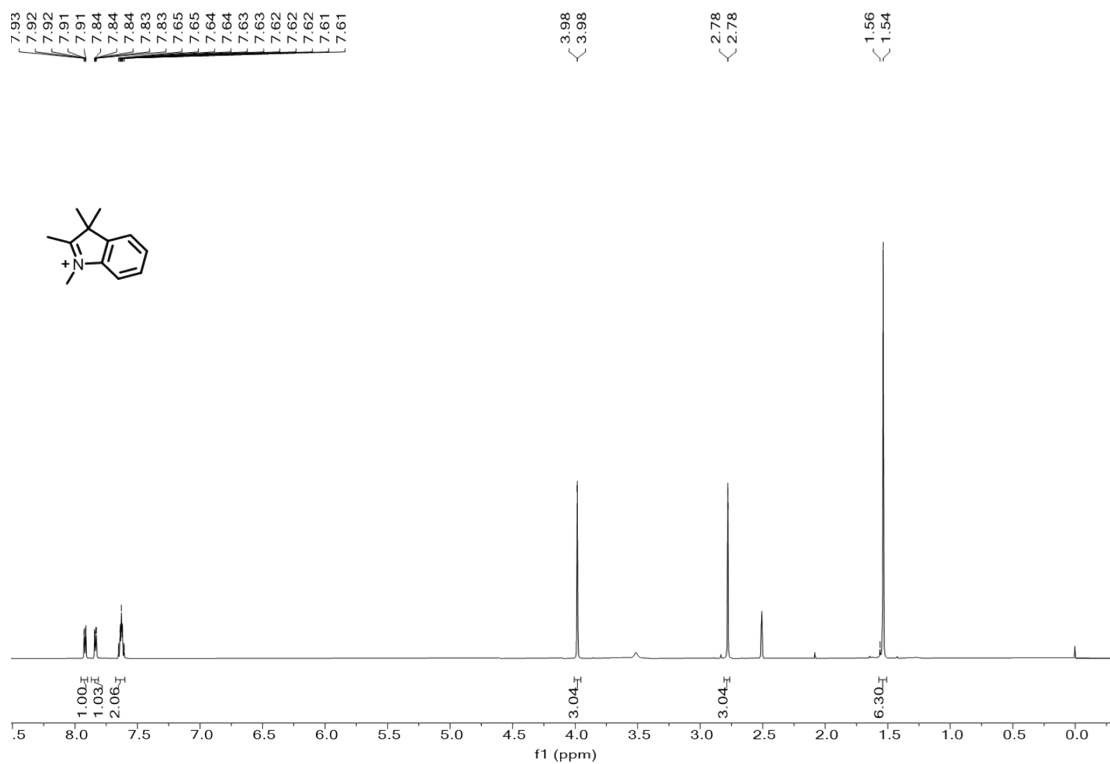

**Fig. S18.** The <sup>1</sup>H NMR spectrum of compound YD-1 in DMSO-*d*<sub>6</sub>

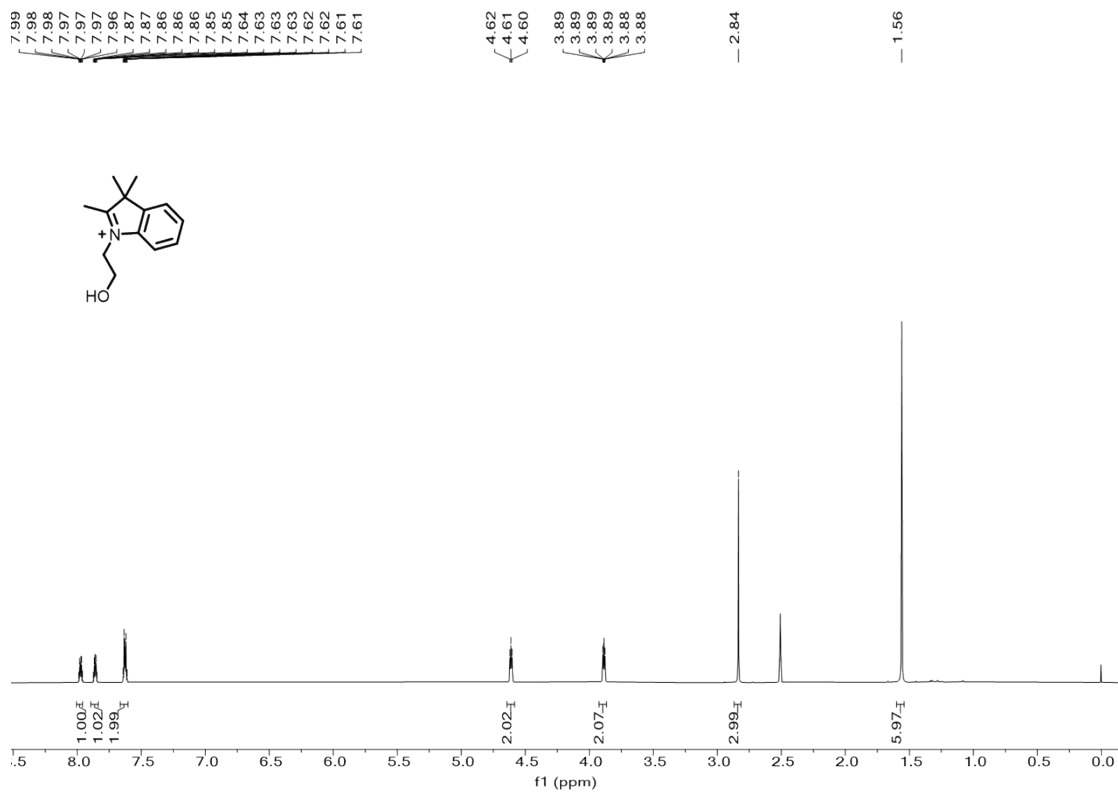

**Fig. S19.** The <sup>1</sup>H NMR spectrum of compound YD-OH in DMSO-*d*<sub>6</sub>

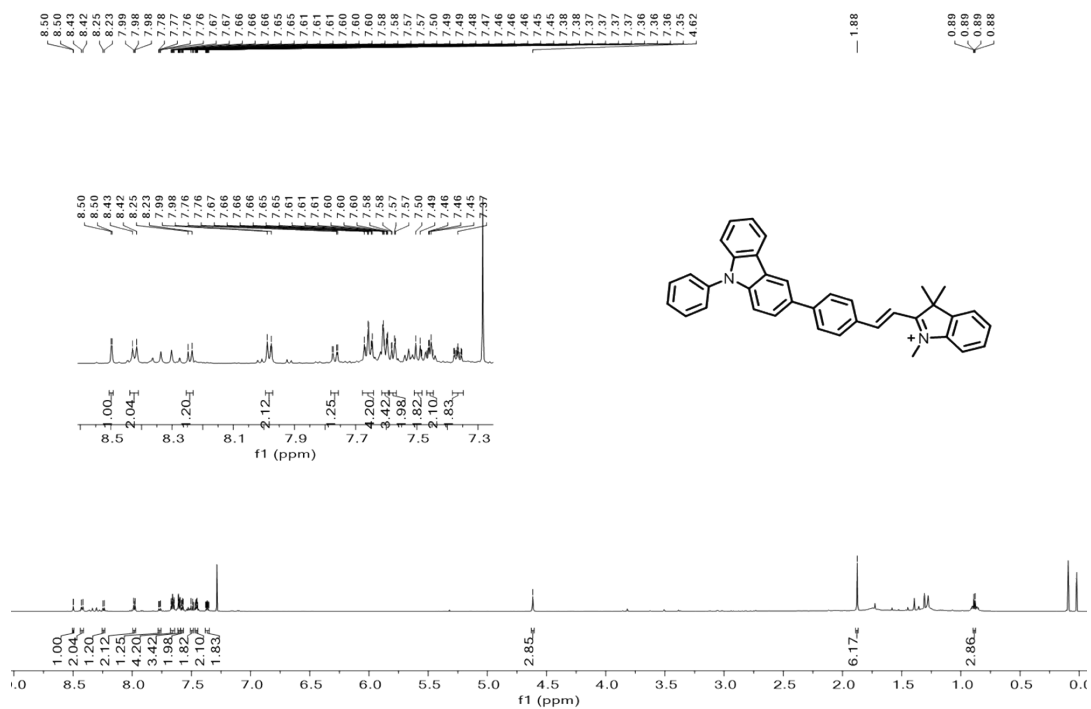

Fig. S20. The <sup>1</sup>H NMR spectrum of compound KY-1 in Chloroform-*d*.

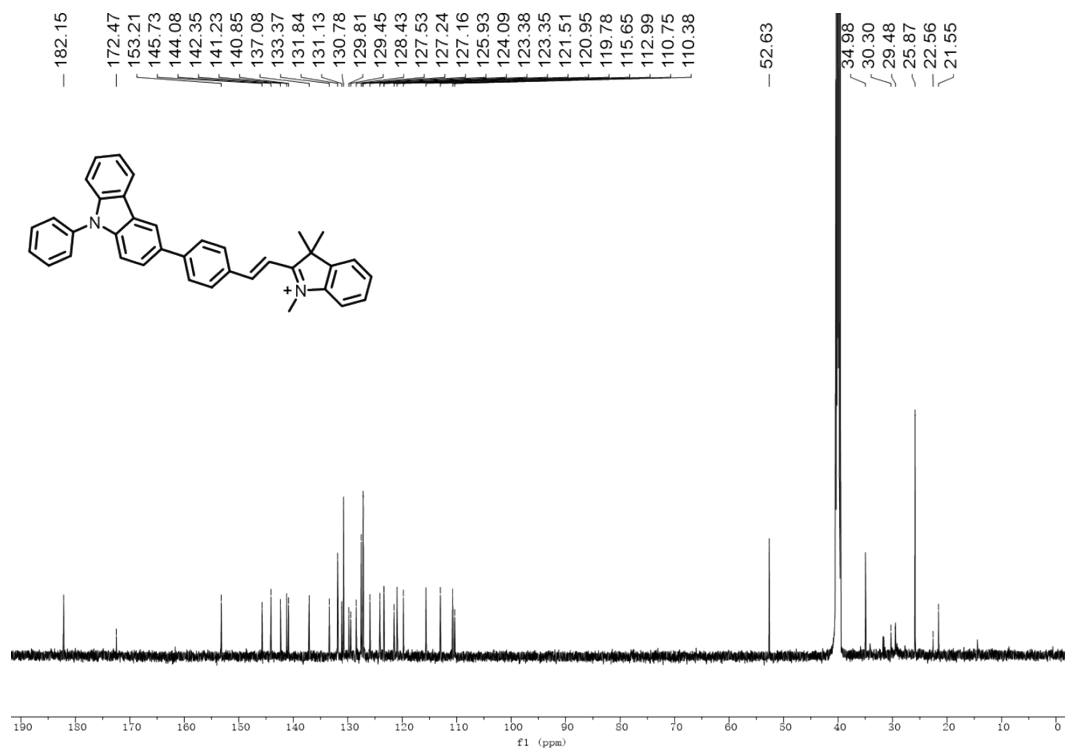

Fig. S21. The <sup>13</sup>C NMR spectrum of compound KY-1 in Chloroform-*d*.

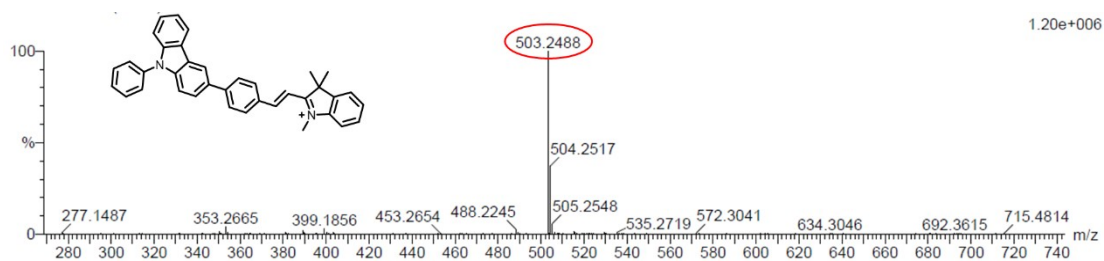

**Fig. S22.** HRMS spectrum of compound KY-1.

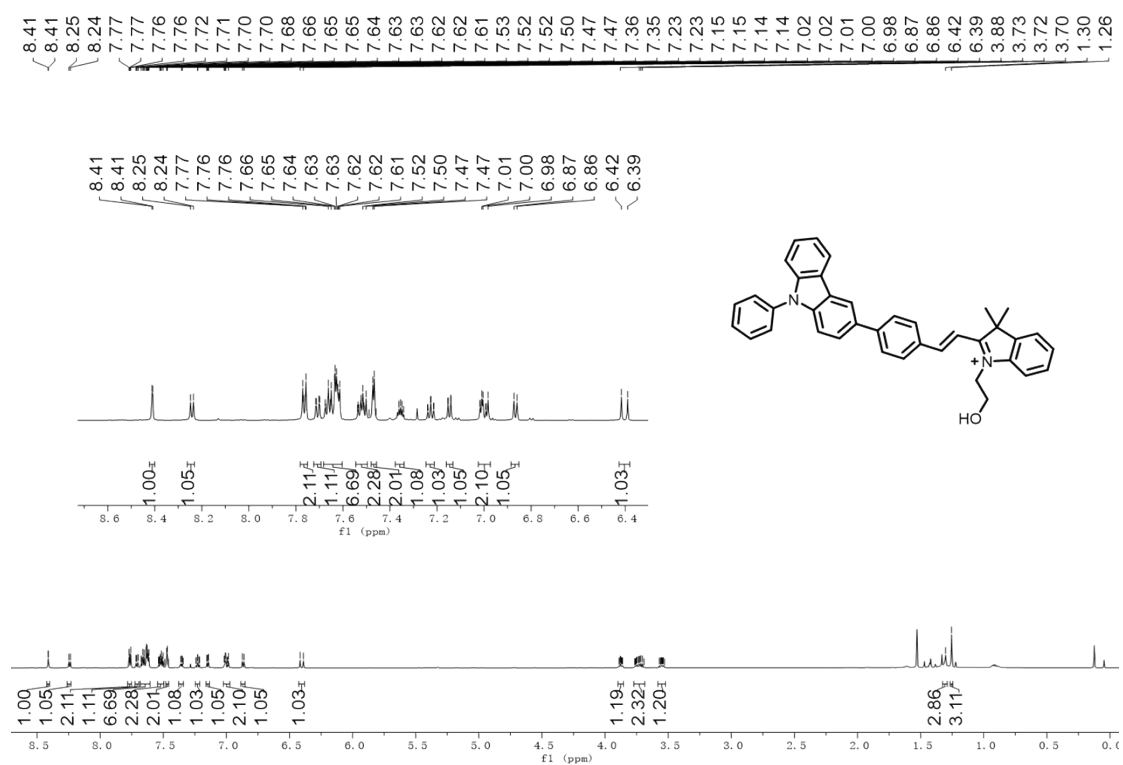

**Fig. S23.** The  $^1\text{H}$  NMR spectrum of compound KY-OH in Chloroform- $d$ .

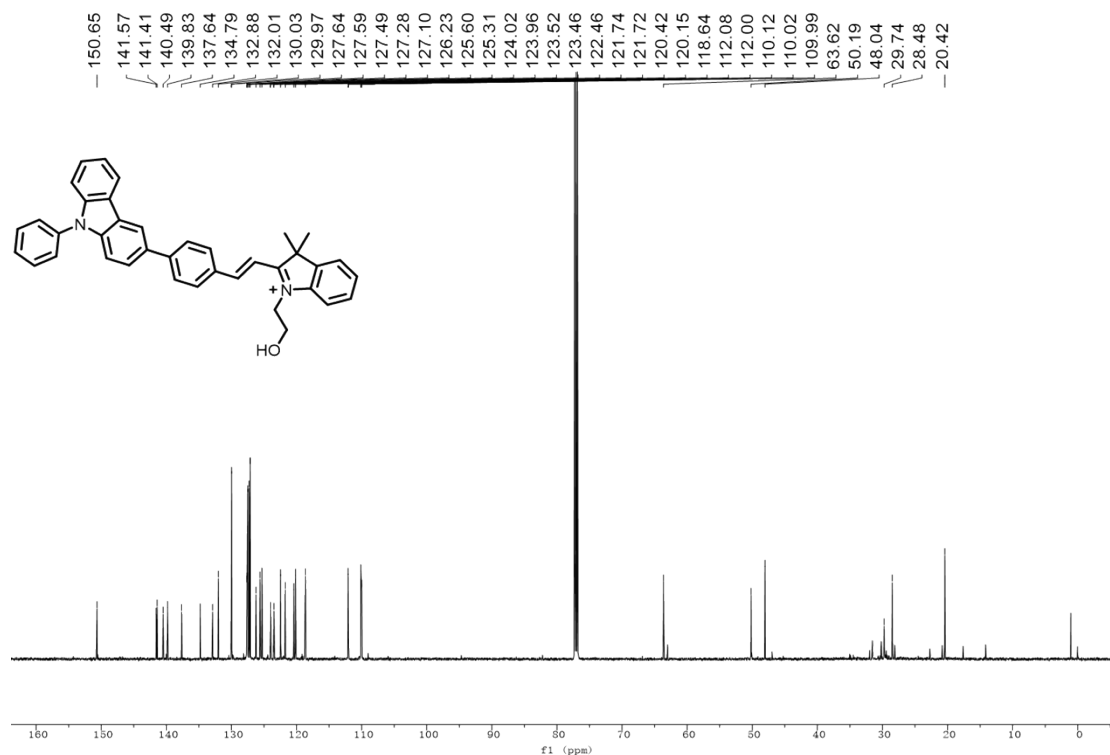

Fig. S24. The <sup>13</sup>C NMR spectrum of compound **KY-OH** in Chloroform-d.

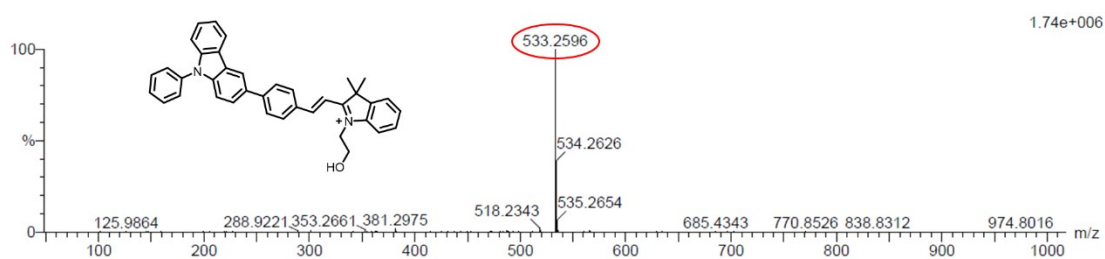

Fig. S25. HRMS spectrum of compound **KY-OH**.

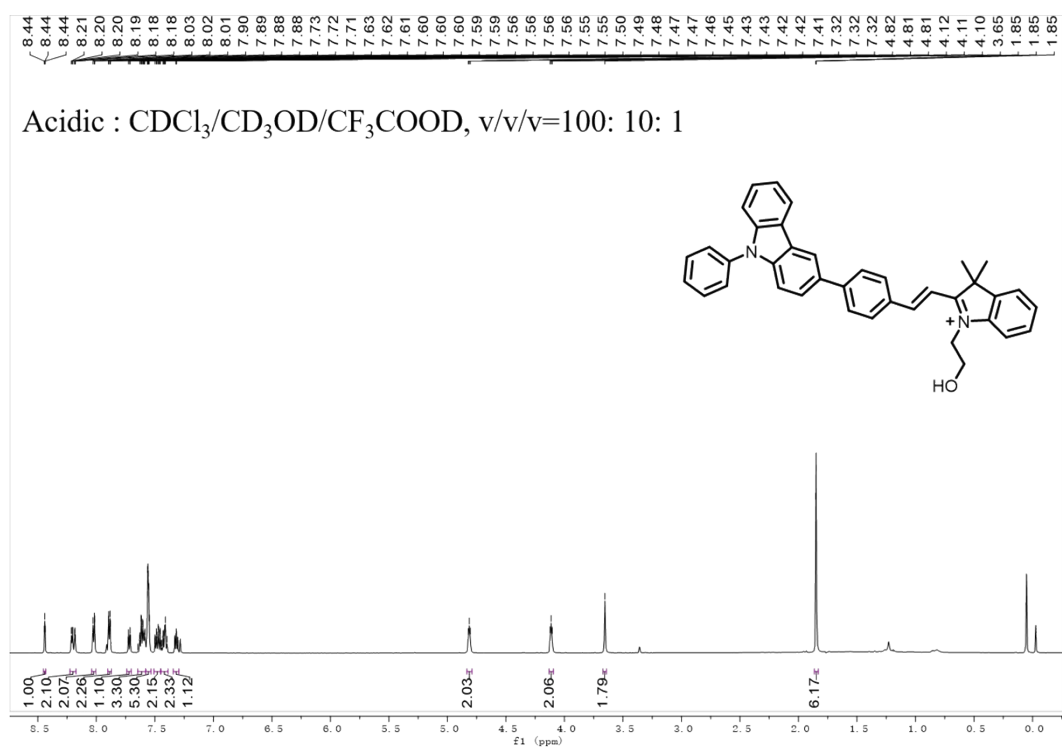

**Fig. S26.** The  $^1\text{H}$  NMR spectrum of compound **KY-OH**. ( $\text{CDCl}_3/\text{CD}_3\text{OD}/\text{CF}_3\text{COOD}$ , v/v/v=100: 10: 1)

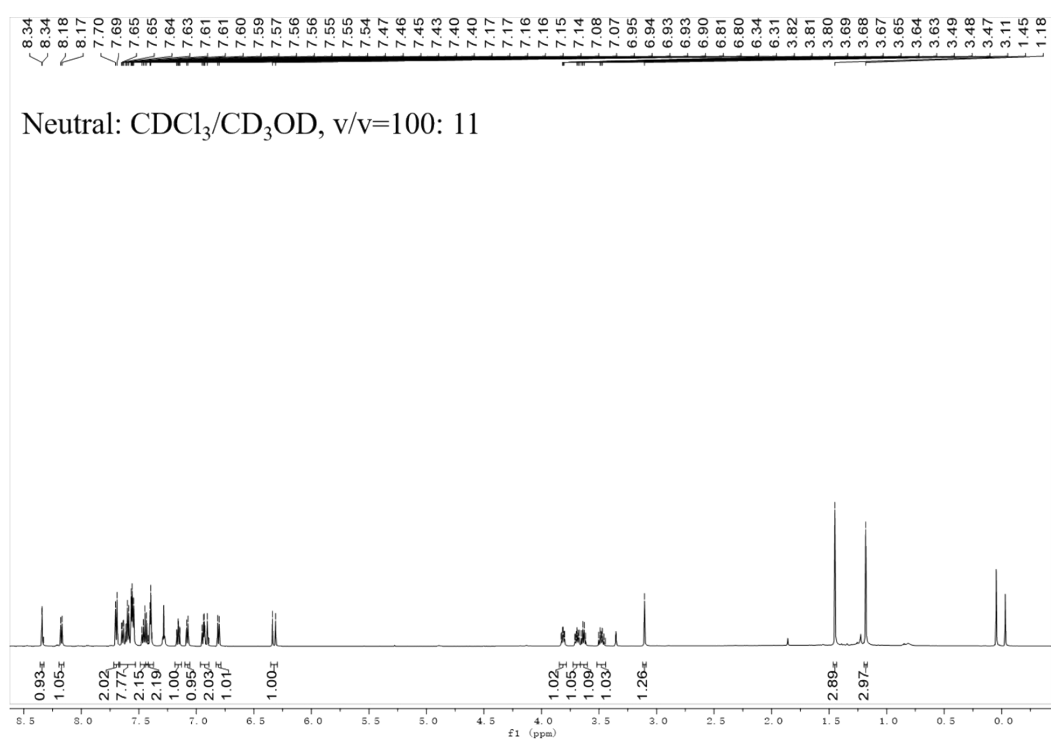

**Fig. S27.** The  $^1\text{H}$  NMR spectrum of compound **KY-OH**. ( $\text{CDCl}_3/\text{CD}_3\text{OD}$ , v/v=100: 11)

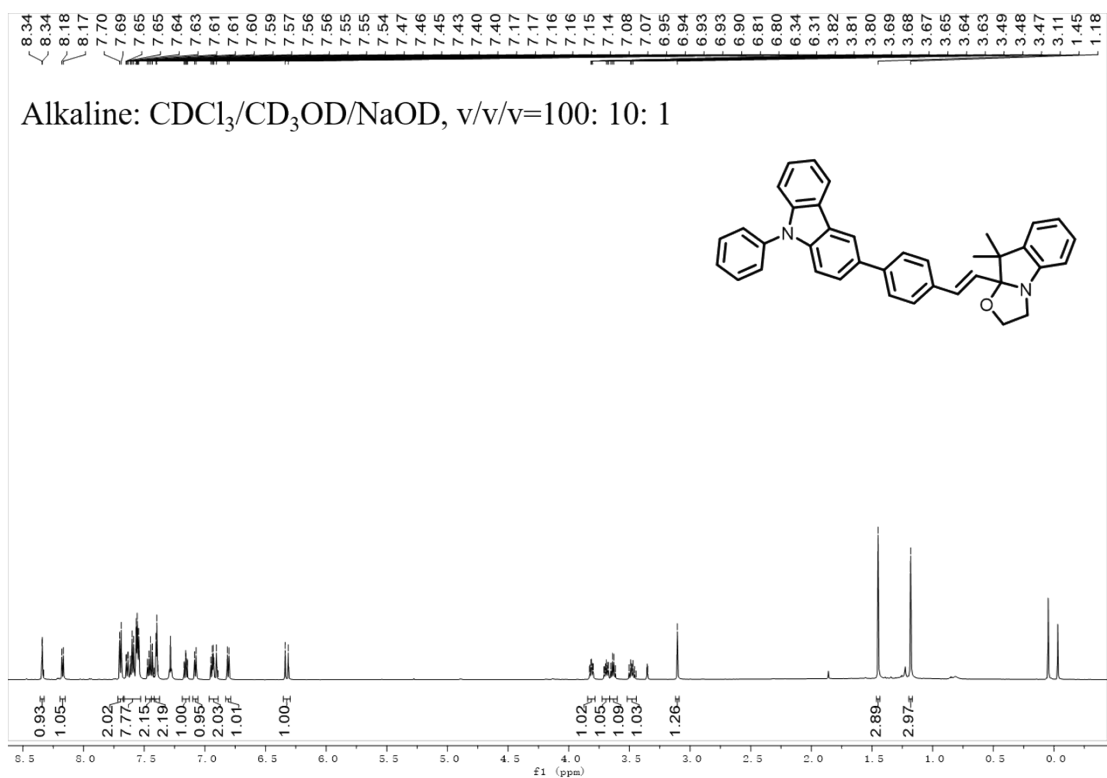

**Fig. S28.** The <sup>1</sup>H NMR spectrum of compound **KY-OH**. (CDCl<sub>3</sub>/CD<sub>3</sub>OD/NaOD, v/v/v=100: 10: 1)

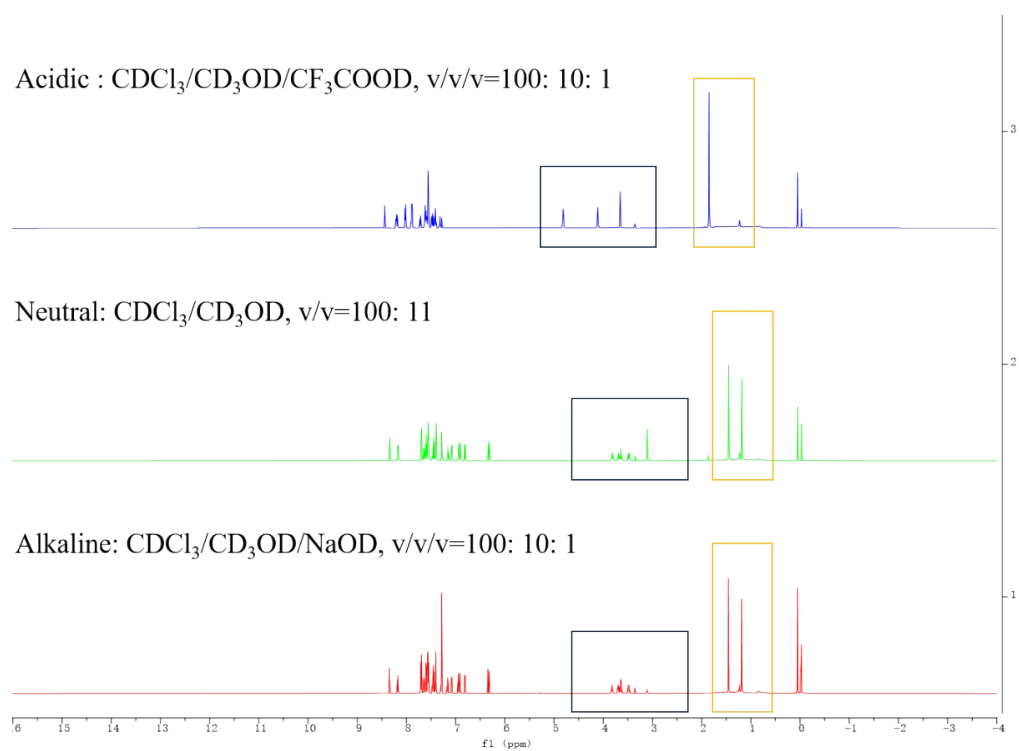

**Fig. S29.** Comparison of <sup>1</sup>H NMR spectra of compound **KY-OH** under different pH conditions.
